# Supplementary material
Source: PubMed Central journal article supplement (PMC9805355)
Supplement: NIHMS1857718-supplement-2.pdf [file NIHMS1857718-supplement-2.pdf]

## Supporting information

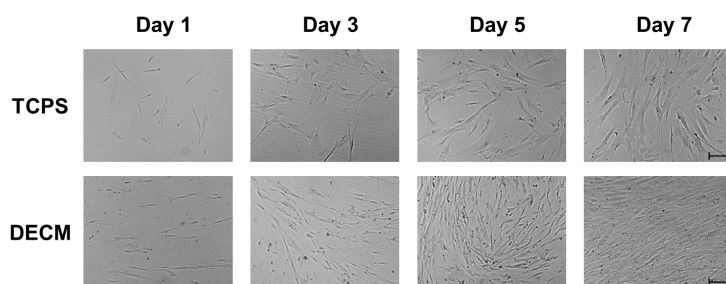

Figure S1. Cell morphology of UC-MSCs cultured on TCPS and DECM substrates.

Representative images of phase-contrast microscopy revealed the cell density when

UC-MSCs were cultured on TCPS and DECM substrates. Scale bar = 100  $\mu\text{m}$ .

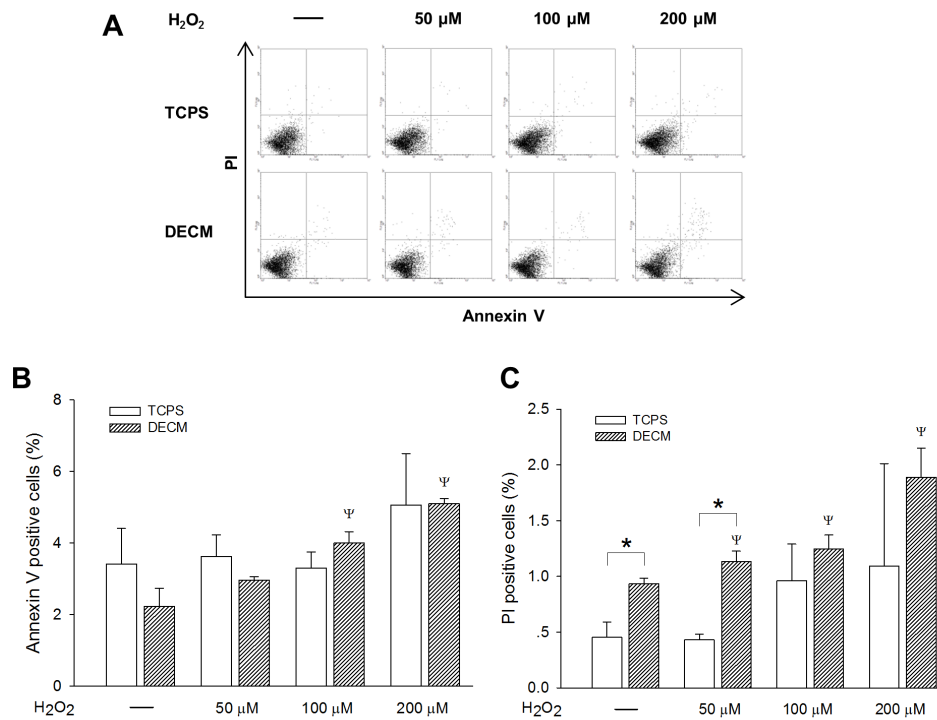

Figure S2. Flow cytometry was used to analyze the apoptotic cells induced by H<sub>2</sub>O<sub>2</sub> in triplicate wells. The percentage of Annexin V-positive staining represented the early apoptotic cells. The percentage of PI-positive staining represented the late apoptotic cells. Values are the mean ± S.E. of three independent experiments ( $n = 3$ ). Statistically significant differences are indicated by \* ( $p < 0.05$ ); Φ ( $p < 0.05$ ) versus untreated cells on TCPS; Ψ ( $p < 0.05$ ) versus untreated cells on ECM.

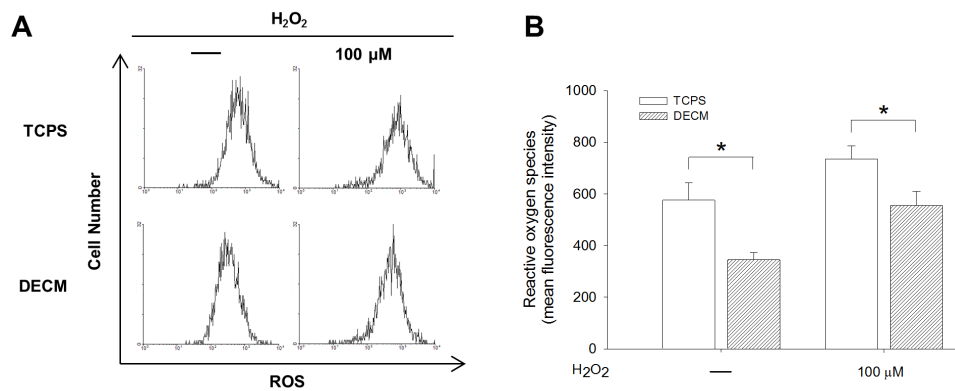

Figure S3. Intracellular ROS of UC-MSCs was labeled, in quadruplicate, with 2',7'-dichlorofluorescein diacetate (DCF-DA) and the fluorescence intensity was measured by flow cytometry. Values are the mean  $\pm$  S.E. of four independent experiments ( $n = 4$ ). Statistically significant differences are indicated by \* ( $p < 0.05$ );  $\Phi$  ( $p < 0.05$ ) versus untreated cells on TCPS;  $\Psi$  ( $p < 0.05$ ) versus untreated cells on ECM.

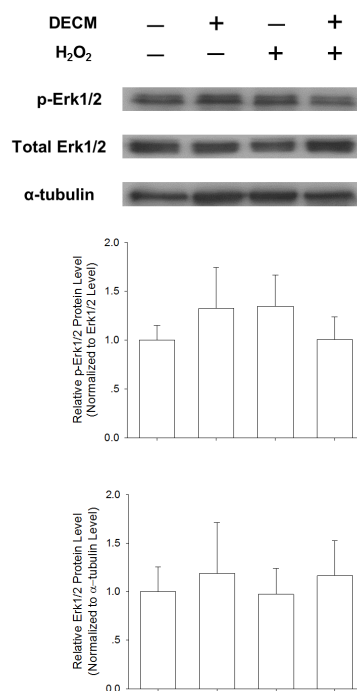

Figure S4. The Erk1/2 signaling pathway was evaluated. The levels of p-Erk1/2 were normalized to total Erk1/2 protein. The levels of Erk1/2 were normalized to  $\alpha$ -tubulin protein. Values are the mean  $\pm$  S.E. of three independent experiments ( $n = 3$ ). Statistically significant differences are indicated by \* ( $p < 0.05$ ).
